# Supplementary material
Source: PubMed Central journal article supplement (PMC2131688)
Supplement: pnas_0604731103_1.pdf [file pnas_0604731103_1.pdf]

▬ α1 ▬ α2 ▬

Sce 129 VEKPQLKFKSPI DNSESHPI PLLKEKPNALKPLSESL - - RLVDDDENNP SH - - - - -  
 Cgl 129 I SKPQLNFKTPVDNSESHPIKPLLI EKPNAKLSI EEST - - QLVLATEDI PEH - - - - -  
 Hsa 180 I I RPQLKFRKI DNSNT - PFLPKI FIKPNAQKPLPQALS KERRERPQDRPEDLDVPPALA  
 Eco - - - - -

▬ α3 ▬ α4 ▬ β1 ▬ α5

Sce 179 - - - - - YPHPYEYEI DHQEYSPEI LQI REEIPSKSWDDSVPI WVDTSTELLE  
 Cgl 179 - - - - - FQQPYEYEI LNQEYNNDI LEKKEPI PSTSWDTNAI WVDNI NSLQ  
 Hsa 239 DFI HQQRTQQVEQDMFAHPYQYELNHFTPADAVLQKPQPQLYRPI EETPCHFI SSLDELV  
 Eco 1 - - - - - MNYQMI TDDALA

▬ β2 ▬ β3 ▬ β4 ▬ α6

Sce 224 SML EDL KNTKEI AVDL EHH DYRSYGI VCLMQI STRERDYLVD TLKLR ENLHI LNEVFTN  
 Cgl 224 DMMQELKKSSEI AVDL EHHDFRSYGLVCLMQI STRTQDYI VDTI ALRDDLKMLNEVFTN  
 Hsa 299 ELNEKLLNCQEF AVDL EHSYRSFLGLTCLMQI STRTEDFII DTLELRSDMYI LNESLTD  
 Eco 14 SLCEAVRAFP AI ALDTEFVVRTTYYPQLGLIQLFDGEHLALI DPLGI - TDWSPLKAILRD

▬ β5 ▬ α7 ▬ β6 ▬ α8 ▬ α9

Sce 284 PSI VKVF HGAFMDI IWLQRDLGLYVVG LFDTYHASKAI GLPRH - SLAYLLENFANFKTSK  
 Cgl 284 PLI TKVF HGAFMDI IWLQRDLGLYI VSLFDTFHASKALGLPKH - SLAYLLEKYANFKTSK  
 Hsa 359 PAI VKVF HGADSDI EWLQKDFGLYVVMFDT HQAARLLNLGRH - SLDHLLKLYCNVDSNK  
 Eco 73 PSI TKFL HAGSEDL EVFLNVGELPQPLI DTQI LAAFGRPMS WGFASMVEEYSGVTLDK

▬ α10 ▬ α11

Sce 343 KYQLADWRI RPLSKPMTAY ARAD THFLLNI YDQLRNKLI ESNKLAGVLYESRNVAKRRFE  
 Cgl 343 KYQLADWRRRPLSKAMMAY ARAD THFLLNI FDQMRNGLI SSGKLAGVLRERNSVALRRFE  
 Hsa 418 QYQLADWRI RPLPEEMLS YARD DTHYLLYI YDKMRLEMWERGNGQP VQLQVWQRS RDI C  
 Eco 133 SESRTDWLARPLTERQCE YAAADVWYLLPI TAKLMVETEASGWLPAALDECRLMQMRR - -

▬ α12 ▬ α13

Sce 403 YSKYRPLTPSSEVYSPI EKESPWKILMYQYNI PPEREVLVRELYQWRDLIARRDDESPRF  
 Cgl 403 YSKYKPKIPVANI FTPVEKESPWRTL MYQYNI PVDKEPLI RELYWRDMMARRDDESPRY  
 Hsa 478 LKKFIKPI FTDESYLELYRKQ - - - - - KKHLNTQQLTAFQLLFAWRDKTARREDESYGY  
 Eco 191 - - - - - QEVVAPEDA WRDITNA - - - - - WQLRTRQLACLQLLADWRLRKARERDLAVNF

▬ α14 ▬ α15 ▬ α16

Sce 463 VMPNQLLAALVAYTPTDVI GVVSLTNGVTEHVQRNAKLLANLIRDALRNIK - - NTNEEA -  
 Cgl 463 VMPNQLLVSLVAYGPVDPI SVVSVSSVTDHVRNRSKTLANLIIKKLEEI K - - LGEV KSI  
 Hsa 531 VLPNHMMLKI AEELPKPEQGI I ACCNPVPLVRQIQI NEMHLIIQQAREMPL - - LKSEVAA  
 Eco 238 VVREEHLWSVARYMPGS - LGELDSLGLSGSEIRFHGKTL LALVEKAQTLPEEALPQPMLN

Sce 520 - TPI PSSETKADGILLLET  
 Cgl 521 NNRLPSSLDV SQDEL - QF  
 Hsa 589 GVKKSGPLPSAERLE NVL  
 Eco 297 LMDMPGYRKAFKAIKSLI

▬ N-terminal domain  
▬ Exonuclease domain  
▬ Linker  
▬ HRDC domain
