# Supplementary material
Source: PubMed Central journal article supplement (PMC2131688)
Supplement: pnas_0604731103_2.pdf [file pnas_0604731103_2.pdf]

**Table 2. Summary of data collection and structure refinement statistics**

| Data collection                     |                    |                        |                         |                         |
|-------------------------------------|--------------------|------------------------|-------------------------|-------------------------|
| Data set                            | Native             | MnCl <sub>2</sub>      | Mn/Zn/AMP               | Mn/Zn/UMP               |
| Beam line                           | DESY X13           | BESSY BL1              | MAXLAB 911-2            | Home source             |
| Soak                                | –                  | 10mM MnCl <sub>2</sub> | 5mM MnCl <sub>2</sub>   | 5mM MnCl <sub>2</sub>   |
|                                     |                    |                        | 0.5mM ZnCl <sub>2</sub> | 0.5mM ZnCl <sub>2</sub> |
|                                     |                    |                        | 5mM AMP                 | 5mM UMP                 |
| Space group                         | P3 <sub>1</sub> 21 | P3 <sub>1</sub> 21     | P3 <sub>1</sub> 21      | P3 <sub>1</sub> 21      |
| Unit cell, Å                        |                    |                        |                         |                         |
| a = b                               | 110.34             | 110.68                 | 110.85                  | 110.57                  |
| c                                   | 80.26              | 79.729                 | 79.87                   | 79.33                   |
| Wavelength, Å                       | 0.8048             | 1.50                   | 1.043                   | 1.542                   |
| Resolution (outer shell), Å         | 95–2.1 (2.18–2.10) | 36–2.25 (2.33–2.25)    | 95–2.3 (2.38–2.30)      | 95–2.7(2.80–2.70)       |
| No. of observations (unique)        | 334,137 (34,393)   | 269,714 (27,124)       | 232,707, (25,665)       | 244,172 (15,774)        |
| Completeness (outer shell), %       | 98.5 (91.3)        | 99.7 (98.8)            | 99.9 (100.0)            | 98.4 (92.9)             |
| Data redundancy (outer shell)       | 4.9 (3.6)          | 5.6 (4.9)              | 5.3 (5.1)               | 4.1 (3.0)               |
| Mean I/σ <sub>1</sub> (outer shell) | 25.6 (2.6)         | 34.6 (4.9)             | 25.0 (2.3)              | 18.7 (1.5)              |
| R <sub>sym</sub> (outer shell), %   | 5.8 (50.3)         | 4.0 (34.1)             | 5.3 (72.6)              | 6.1 (66.6)              |

| Refinement                             |                |                   |                |                |
|----------------------------------------|----------------|-------------------|----------------|----------------|
| Data set                               | Native         | MnCl <sub>2</sub> | Mn/Zn/AMP      | Mn/Zn/UMP      |
| Resolution range used (outer shell), Å | 95–2.1         | 36–2.25           | 95–2.3         | 95–2.7         |
| No. of reflections used (free set)     | 30,976 (3,087) | 26,390 (2,646)    | 24,433 (2,459) | 14,609 (1,465) |
| Residual R-factor (outer shell), %     | 23.3 (33.0)    | 22.3 (29.9)       | 23.8 (32.2)    | 21.9 (33.3)    |
| Residual free R (outer shell), %       | 29.2 (36.5)    | 27.9 (37.8)       | 28.9 (35.4)    | 28.7 (37.9)    |
| No. of atoms (solvent atoms)           | 3.441 (201)    | 3.492 (252)       | 3.392 (127)    | 3.398 (135)    |
| Rms deviation on bond lengths, Å       | 0.008          | 0.007             | 0.007          | 0.007          |
| Rms deviation on bond angles, °        | 1.34           | 1.27              | 1.24           | 1.32           |
| Luzzati error (cross-validated), Å     | 0.32 (0.40)    | 0.31 (0.40)       | 0.34 (0.41)    | 0.37 (0.48)    |
| Ramachandran plot statistics, %        |                |                   |                |                |
| Most favorable regions                 | 84.3           | 84.4              | 85.5           | 84.0           |
| Additionally allowed regions           | 14.3           | 13.4              | 13.4           | 14.0           |
| Generously allowed regions             | 1.4            | 2.2               | 1.1            | 2.0            |
| Disallowed regions                     | 0.0            | 0.0               | 0.0            | 0.0            |
