# Supplementary material
Source: PubMed Central journal article supplement (PMC2131688)
Supplement: pnas_0604731103_3.pdf [file pnas_0604731103_3.pdf]

**Table 3. Summary of heavy atom data sets**

| Data collection                   |                         |                    |                        |                                        |                    |                    |                    |                    |
|-----------------------------------|-------------------------|--------------------|------------------------|----------------------------------------|--------------------|--------------------|--------------------|--------------------|
| Data set                          | Hg MIRAS                | Pb MIRAS           | Yb MIRAS               | Pt MAD                                 |                    |                    | I MAD              |                    |
| Beam line                         | DESY BW7A               | DESY BW7A          | DESY BW7A              | DESY BW7A                              |                    |                    | DESY BW7A          |                    |
| Soak                              | 10 mM HgCl <sub>2</sub> | 25 mM TMLA         | 1 mM YbCl <sub>3</sub> | 10 mM K <sub>2</sub> PtCl <sub>4</sub> |                    |                    | 500 mM KI          |                    |
| Space group                       | P3 <sub>1</sub> 21      | P3 <sub>1</sub> 21 | P3 <sub>1</sub> 21     | P3 <sub>1</sub> 21                     |                    |                    | P3 <sub>1</sub> 21 |                    |
| Unit cell, Å                      |                         |                    |                        |                                        |                    |                    |                    |                    |
| a = b                             | 111.18                  | 110.23             | 109.77                 | 110.87                                 |                    |                    | 110.83             | 110.87             |
| c                                 | 80.12                   | 79.97              | 80.31                  | 80.36                                  |                    |                    | 80.06              | 80.36              |
| Wavelength, Å                     | 1.072                   | 0.8048             | 0.8048                 | 1.071 (peak)                           | 1.072 (inflection) | 0.8793 (remote)    | 1.072 (inflection) | 1.071 (peak)       |
| Resolution (outer shell), Å       | 96–2.5 (2.59–2.50)      | 95–2.1 (2.18–2.10) | 95–2.3 (2.38–2.30)     | 96–2.3 (2.38–2.30)                     | 96–2.3 (2.38–2.30) | 95–2.3 (2.38–2.30) | 96–2.3 (2.38–2.30) | 96–2.3 (2.38–2.30) |
| No. of observations (unique)      | 334.395 (20.086)        | 372.202 (33.338)   | 372.451 (25.459)       | 420.963 (25.718)                       | 424.572 (25.592)   | 369.026 (25.548)   | 424.572 (25.592)   | 420.963 (25.718)   |
| Completeness (outer shell), %     | 93.9 (96.2)             | 99.9 (99.9)        | 98.4 (98.6)            | 98.9 (98.7)                            | 98.9 (98.7)        | 99.1 (98.1)        | 98.9 (98.7)        | 98.9 (98.7)        |
| Data redundancy (outer shell)     | 4.8 (4.8)               | 5.9 (5.2)          | 3.4 (3.1)              | 4.3 (4.3)                              | 4.2 (4.3)          | 4.3 (4.1)          | 4.2 (4.3)          | 4.3 (4.3)          |
| I/σ <sub>1</sub> (outer shell)    | 18.4 (2.6)              | 26.2 (3.3)         | 15.8 (1.4)             | 26.5 (2.2)                             | 26.5 (2.1)         | 26.9 (2.5)         | 26.5 (2.1)         | 26.5 (2.2)         |
| R <sub>sym</sub> (outer shell), % | 8.1 (53.0)              | 8.9 (64.5)         | 7.1 (72.5)             | 4.6 (60.9)                             | 4.1 (60.6)         | 4.4 (74.1)         | 4.1 (60.6)         | 4.6 (60.9)         |
