# Supplementary material
Source: PubMed Central journal article supplement (PMC2131688)
Supplement: pnas_0604731103_4.pdf [file pnas_0604731103_4.pdf]

**Table 4. Primer sequences**

| Name   | Probe target | Sequence                                                               |
|--------|--------------|------------------------------------------------------------------------|
| THJ280 | –            | 5'-GGGGGGCTCGAGGCTAAAGAAGGATATGTT-3'                                   |
| THJ281 | –            | 5'-GGGGAATTCCTGACACCGTCC-3'                                            |
| THJ493 | –            | 5'-GCAAGAAGAGACGCTGAATCGCCACGATTTG-3'                                  |
| THJ494 | –            | 5'-CAAATCGTGGCGATTCAGCGTCTCTTCTTGC-3'                                  |
| THJ919 | –            | 5'-AACAAACAAACAGCTTATAAGCACCCAATAAGTGC GTTATGGTCGAAAACCTCAGTTGAAATT-3' |
| THJ920 | –            | 5'-CCATAATTTATAAATAAAAAAATACGCTTGTTTTACATAATCAAGTCTCCAACAATATTCCGCT-3' |
| THJ975 | –            | 5'-CGAAAACCTGCTTTGAAATTAAGTCCAATTGATGCTAGCGAAAGTC-3'                   |
| THJ976 | –            | 5'-GACTTTCGCTAGCATCAATTGGACTTTTAAATTTCAAAGCAGGTTTTTCG-3'               |
| THJ977 | –            | 5'-AACGCACTTATTGGGTGCTTA-3'                                            |
| THJ978 | –            | 5'-TATGTAAAACAAGCGTATTTT-3'                                            |
| 2      | 5' ETS       | 5'-GGTCTCTCTGCTGCCGG-3'                                                |
| OBS275 | snR40        | 5'-ACCTGAGTACTTGTGGCATC-3'                                             |
| o5.8S  | 5.8S rRNA    | 5'-TGC GTTCTTCATCGATGCGAGAACC-3'                                       |
